# Supplementary material
Source: PubMed Central journal article supplement (PMC8366056)
Supplement: mmc2.pdf [file mmc2.pdf]

**Supplementary Table 1.** Definition of chronic neurologic disorders (CND).

| CND group                         | Associated diagnoses <sup>a</sup>                                                                                                                                           |
|-----------------------------------|-----------------------------------------------------------------------------------------------------------------------------------------------------------------------------|
| Dementia                          | Alzheimer's disease, vascular dementia, frontotemporal dementia, Creutzfeldt Jacob disease, dementia associated with vitamin B12 deficiency, normal pressure hydrocephalus. |
| Movement disorders                | Parkinson's disease, progressive supranuclear palsy, dementia with Lewy bodies, corticobasal syndrome, Huntington's chorea, Wilson's disease, dystonic syndromes.           |
| Stroke history                    | Prior history of stroke causing long-term physical or cognitive sequelae.                                                                                                   |
| Neuromuscular disorders           | Neuromuscular junction disorders (Myasthenia gravis, Lambert-Eaton syndrome, neuromyotonia), myopathy, neuropathy, radiculopathy, plexopathy.                               |
| Central nervous system malignancy | Primary central nervous system tumors, metastases, meningeal carcinomatosis, paraneoplastic syndromes.                                                                      |

<sup>a</sup> Associated ICD-10 codes for all diagnosis under each CND group were queried in all study subjects.

All of the following criteria must be met by World Health Organization (WHO) criteria:<sup>15</sup> (A) cause persistent disability, (B) limit an individual's functioning, (C) interfere with a person's ability to engage in daily activities.
