# Supplementary material
Source: PubMed Central journal article supplement (PMC8366056)
Supplement: mmc3.pdf [file mmc3.pdf]

**Supplementary Table 2.** Multivariable logistic regression models evaluating the risk for severe COVID-19<sup>a</sup> after random allocation of patients with missing DMT data into each categorical group.

| DMT                         | 5% randomization<br>(n=368) |         | 10% randomization<br>(n=404) |         |
|-----------------------------|-----------------------------|---------|------------------------------|---------|
|                             | OR (95% CI)                 | p value | OR (95% CI)                  | p value |
| Interferon                  | 0.72 (0.38–2.34)            | 0.84    | 0.92 (0.34–2.78)             | 0.72    |
| Glatiramer acetate          | 0.74 (0.37–2.03)            | 0.67    | 0.85 (0.42–2.83)             | 0.74    |
| Teriflunomide               | 0.93 (0.45–2.43)            | 0.86    | 0.91 (0.56–2.59)             | 0.69    |
| Fumarates <sup>b</sup>      | 1.38 (0.32–2.22)            | 0.76    | 0.97 (0.39–2.54)             | 0.58    |
| S1P modulators <sup>c</sup> | 1.21 (0.49–2.56)            | 0.85    | 1.43 (0.62–2.65)             | 0.65    |
| Natalizumab                 | 1.42 (0.51–2.19)            | 0.71    | 1.04 (0.74–2.93)             | 0.76    |
| Anti-CD20 <sup>d</sup>      | 2.41 (1.40–4.57)            | 0.02    | 2.67 (1.32–5.73)             | 0.042   |
| Other                       | 0.94 (0.32–2.64)            | 0.80    | 1.01 (0.37–2.41)             | 0.65    |
| No therapy <sup>e</sup>     | 1 (ref)                     |         | 1 (ref)                      |         |

<sup>a</sup>Intensive care unit admission, mechanical ventilation, and/or death.

<sup>b</sup>Dimethyl fumarate, diroximel fumarate, or monomethyl fumarate.

<sup>c</sup>Fingolimod, siponimod, or ozanimod.

<sup>d</sup>Ocrelizumab or rituximab.

<sup>e</sup>The no therapy group was used as the reference category.

Abbreviations: CI, confidence interval; COVID-19, corona virus disease 2019; OR, odds ratio.
