# Supplementary material
Source: PubMed Central journal article supplement (PMC8366056)
Supplement: mmc4.pdf [file mmc4.pdf]

**Supplementary Table 3.** Summary of discharge disposition among hospitalized patients with COVID-19.

| Discharge disposition       | Value <sup>a</sup>  |                         | p value |
|-----------------------------|---------------------|-------------------------|---------|
|                             | MS group<br>(n=261) | Non-MS group<br>(n=608) |         |
| Home/self-care              | 140 (67.6)          | 184 (65.2%)             | 0.87    |
| Home/home health            | 17 (8.2%)           | 23 (8.1%)               | 0.99    |
| Inpatient rehab             | 4 (1.9%)            | 3 (1.1%)                | 0.97    |
| Skilled nursing facility    | 13 (6.3%)           | 15 (5.3%)               | 0.89    |
| Hospice                     | 2 (1.0%)            | 1 (0.4%)                | 0.94    |
| Left against medical advice | 4 (1.9%)            | 3 (1.1%)                | 0.97    |
| Other                       | 22 (10.6%)          | 40 (14.2%)              | 0.75    |

<sup>a</sup> Data are presented as number (percentage) of subjects, unless otherwise indicated.

<sup>b</sup> In-hospital deaths were excluded.

Abbreviations: COVID-19, coronavirus disease 19.
